# Supplementary material for: Cancer Metabolic Subtypes and Their Association with Molecular and Clinical Features
Source: MDPI journal article supplement (doi:10.3390/cancers14092145), 2022-04-25
Supplement: s1 [file s1]

## Supplementary Figures and Tables

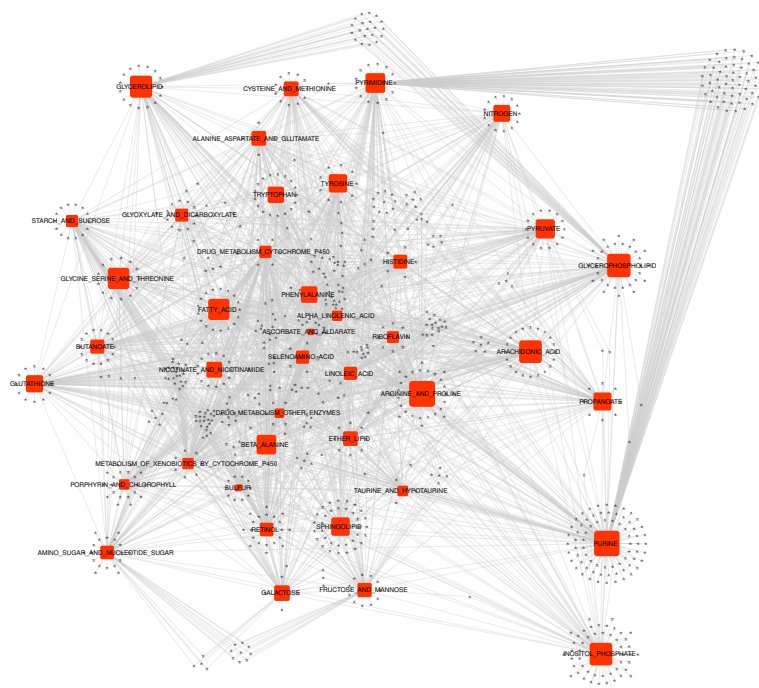

Figure S1: The KEGG pathways (red squares) used to cluster tumor samples and the respective genes (grey triangles) represented as a bipartite network. The size of the squares is proportional to the number of associated genes.

Table S1: Number of samples used for each tumor type.

| ID       | Tumor_type                                                          | Samples |
|----------|---------------------------------------------------------------------|---------|
| ACC      | Adrenocortical Carcinoma                                            | 79      |
| BLCA     | Bladder Urothelial Carcinoma                                        | 408     |
| BRCA     | Breast Invasive Carcinoma                                           | 1093    |
| CESC     | Cervical Squamous Cell Carcinoma and<br>Endocervical Adenocarcinoma | 304     |
| CHOL     | Cholangiocarcinoma                                                  | 36      |
| COAD     | Colon Adenocarcinoma                                                | 285     |
| COADREAD | (= COAD + READ)                                                     | 379     |
| DLBC     | Lymphoid Neoplasm Diffuse Large B-cell<br>Lymphoma                  | 48      |
| ESCA     | Esophageal Carcinoma                                                | 184     |
| GBM      | Glioblastoma Multiforme                                             | 153     |
| GBMLGG   | (= GBM + LGG)                                                       | 669     |
| HNSC     | Head and Neck Squamous Cell Carcinoma                               | 520     |
| KICH     | Kidney Chromophobe                                                  | 66      |
| KIPAN    | (= KICH + KIRC + KIRP)                                              | 889     |
| KIRC     | Kidney Renal Clear Cell Carcinoma                                   | 533     |
| KIRP     | Kidney Renal Papillary Cell Carcinoma                               | 290     |
| LAML     | Acute Myeloid Leukemia                                              | 173     |
| LGG      | Brain Lower Grade Glioma                                            | 516     |
| LIHC     | Liver Hepatocellular Carcinoma                                      | 371     |
| LUAD     | Lung Adenocarcinoma                                                 | 515     |
| LUNG     | (= LUAD + LUSC)                                                     | 1016    |
| LUSC     | Lung Squamous Cell Carcinoma                                        | 501     |
| MESO     | Mesothelioma                                                        | 87      |
| OV       | Ovarian Serous Cystadenocarcinoma                                   | 303     |
| PAAD     | Pancreatic Adenocarcinoma                                           | 178     |
| PCPG     | Pheochromocytoma and Paraganglioma                                  | 179     |
| PRAD     | Prostate Adenocarcinoma                                             | 497     |
| READ     | Rectum Adenocarcinoma                                               | 94      |
| SARC     | Sarcoma                                                             | 259     |
| SKCM     | Skin Cutaneous Melanoma                                             | 103     |
| STAD     | Stomach Adenocarcinoma                                              | 415     |
| STES     | (= STAD + ESCA)                                                     | 599     |
| TGCT     | Testicular Germ Cell Tumors                                         | 150     |
| THCA     | Thyroid Carcinoma                                                   | 501     |
| THYM     | Thymoma                                                             | 120     |
| UCEC     | Uterine Corpus Endometrial Carcinoma                                | 176     |
| UCS      | Uterine Carcinosarcoma                                              | 57      |
| UVM      | Uveal Melanoma                                                      | 80      |

Table S2: Molecular and phenotypic variables analyzed for association with metabolic subtypes

| class          | description                        | type       |
|----------------|------------------------------------|------------|
| CNA            | Copy number alterations            | molecular  |
| Methylation    | Global DNA methylation             | molecular  |
| miRNA          | microRNA expression                | molecular  |
| Mutations      | Specific point mutations           | molecular  |
| Gene Mutations | Gene-level mutations               | molecular  |
| RPPA           | Protein expression                 | molecular  |
| Clinical       | Clinical and histologic parameters | phenotypic |
| OS             | Overall survival                   | phenotypic |
| RFS            | Recurrence-free survival           | phenotypic |

Table S3: Top recurrent associations for each class of variables

| Variable                    | Metabolism              | Number of associations | Tumors associated                                                              |
|-----------------------------|-------------------------|------------------------|--------------------------------------------------------------------------------|
| miRNA: hsa-mir-222          | INOSITOL<br>PHOSPHATE   | 12                     | BLCA, BRCA, CESC,<br>HNSC, KIRC, LGG, LIHC,<br>LUAD, SARC, STAD,<br>TGCT, THCA |
| Methylation                 | GLYCEROLIPID            | 10                     | BLCA, CESC, COAD,<br>HNSC, LGG, PCPG, SARC,<br>TGCT, THCA, THYM                |
| Methylation                 | INOSITOL<br>PHOSPHATE   | 10                     | BLCA, COAD, KIRP, LGG,<br>LIHC, LUAD, PCPG,<br>TGCT, THCA, THYM                |
| Methylation                 | PHENYLALANINE           | 10                     | BLCA, CESC, COAD, LGG,<br>LIHC, LUAD, OV, PCPG,<br>SARC, TGCT                  |
| Methylation                 | PURINE                  | 10                     | BLCA, CESC, KIRP, LIHC,<br>LUAD, PCPG, SARC,<br>TGCT, THCA, THYM               |
| Clinical: histological type | TYROSINE                | 8                      | BRCA, ESCA, LGG, PCPG,<br>SARC, THCA, THYM,<br>UCEC                            |
| RPPA: CCNB1 Cyclin B1       | PURINE                  | 7                      | BLCA, BRCA, KIRC, KIRP,<br>LUAD, TGCT, THYM                                    |
| CNA: chr17p12               | FATTY ACID              | 6                      | COAD, KIRP, LGG, OV,<br>PAAD, TGCT                                             |
| CNA: chr17q11               | GLYCEROLIPID            | 6                      | BRCA, LGG, LUSC, SARC,<br>TGCT, THYM                                           |
| CNA: chr17q21               | GLYCEROLIPID            | 6                      | BRCA, HNSC, LGG, LUSC,<br>TGCT, THYM                                           |
| CNA: chr3p                  | INOSITOL<br>PHOSPHATE   | 6                      | BLCA, BRCA, ESCA,<br>KIRC, LUSC, UVM                                           |
| CNA: chr3p14                | INOSITOL<br>PHOSPHATE   | 6                      | BLCA, BRCA, ESCA,<br>KIRC, LUSC, UVM                                           |
| CNA: chr3p21                | ARGININE AND<br>PROLINE | 6                      | BRCA, ESCA, KIRC,<br>PRAD, SARC, THYM                                          |
| CNA: chr3p21                | INOSITOL<br>PHOSPHATE   | 6                      | BLCA, BRCA, ESCA,<br>KIRC, LUSC, UVM                                           |
| CNA: chr3q                  | PURINE                  | 6                      | BRCA, ESCA, HNSC,<br>LUSC, UCEC, UVM                                           |
| CNA: chr3q24                | PURINE                  | 6                      | BRCA, ESCA, HNSC,<br>LUSC, UCEC, UVM                                           |
| CNA: chr3q25                | PURINE                  | 6                      | BRCA, ESCA, HNSC,<br>LUSC, UCEC, UVM                                           |
| CNA: chr3q26                | PURINE                  | 6                      | BRCA, ESCA, HNSC,<br>LUSC, UCEC, UVM                                           |
| CNA: chr3q27                | PURINE                  | 6                      | BRCA, ESCA, HNSC,<br>LUSC, UCEC, UVM                                           |
| CNA: chr3q28                | FATTY ACID              | 6                      | BRCA, ESCA, HNSC, LGG,<br>LUAD, LUSC                                           |
| CNA: chr3q28                | PURINE                  | 6                      | BRCA, ESCA, HNSC,<br>LUSC, UCEC, UVM                                           |
| CNA: chr3q29                | FATTY ACID              | 6                      | BRCA, ESCA, HNSC, LGG,<br>LUAD, LUSC                                           |

| Variable     | Metabolism   | Number of associations | Tumors associated                    |
|--------------|--------------|------------------------|--------------------------------------|
| CNA: chr3q29 | PURINE       | 6                      | BRCA, ESCA, HNSC,<br>LUSC, UCEC, UVM |
| OS           | PROPANOATE   | 2                      | KIRC, LGG                            |
| OS           | PURINE       | 2                      | ACC, KIRC                            |
| OS           | PYRIMIDINE   | 2                      | ACC, LGG                             |
| OS           | SPHINGOLIPID | 2                      | KIRC, LGG                            |
